# Supplementary material for: Molecular Cloning and Functional Characterization of Mannose Receptor in Zebra Fish (Danio rerio) during Infection with Aeromonas sobria
Source: MDPI journal article supplement (doi:10.3390/ijms160510997), 2015-05-15
Supplement: s1 [file s1]

## Supplementary Information

```
1      GGGGGGGGCGGTGTATCCTGACGTGATTCCCGGGAGTCTGCAGAAGCTCAGCCAAAAG
61     GCAGAGGATAATGCATAAAAGAGCAGCACTTTGCATTTAGGATTACATTTAGAATCAAGA
121    TGAATAATAATTACCGTGGTCGTTTTGCCTGTATTGGAGCTGTCAAAGTCTTTGCACAAT
1      M K I I T V V V L P V L E L S N C F A Q
181    CAGGAGACAGCTTTTTATTATACAATGTGGACTCTAATAAATGCCTGACTAGCACTTTGA
21     S G D S F L L Y N V D S N K C L T S T L
241    ACAGGCTTGTACCTGTGACCCACACAGTGCCCAACAAAAGTTCCGCTGGACTTCAAGTA
41     N R L V T C D P H S A Q Q K F R W T S S
301    ACCGCATTTTGAACACTTTCACAAAGACGTGTCTTGGAGTGGGAAGTAAAGCGGTGGGCA
61     N R I L N T F T K T C L G V G S K A V G
361    AAAGTCTGCAGCCCTTAAAGTGCAACGATGACAATGCTCTGCAGAAGTGGGAATGCCATG
81     K T L Q P L K C N D D N A L Q K W E C H
421    GGAACACATTGCTTGGACTAAAGAATGAGACTCTGTTCTGCTGTAGATTTTAGGGGT
101    G N T L L G L K N E T L F L A V D F R G
481    TACCTGAGATTTCTAATAAGACTGGAATCAGAAGCAAATGGACAATTCATGGCACACAGG
121    L P E I S N K T G I R S K W T I H G T Q
541    ACAGCATTTGCTCTCGGCCTTATGAAGAAATCTACAGCATTGATGGAATGGATTTGGGC
141    D S I C S R P Y E E I Y S I D G N G F G
601    AGACATGCAAGTTTCCTTTTTTGTATGAGAAAAAGTGGTATGCAGATTGTACCACAGTTG
161    Q T C K F P F L Y E K K W Y A D C T T V
661    ATGAACCGGACCAGCGTCTGTGGTGCACAACCAAGACTGACTACAGTTTATATGAGCAGT
181    D E P D Q R L W C A T K T D Y S L Y E Q
721    GGGGATACTGTCCAACACGTGATAGTAAATACTGGACAAAACATCCTCTAACAAACGTCT
201    W G Y C P T R D S K Y W T K H P L T N V
781    ACTACCAGCTGAATGACAGGTCAACTCTGACATGGTACCAGGCTAGAAAGAGCTGTGAGC
221    Y Y Q L N D R S T L T W Y Q A R K S C Q
841    AGCAAGGCGCTGAATTGCTGAGCATATCTGAACCTCACGAACAATCCTTCATAGCAGGAA
241    Q Q G A E L L S I S E P H E Q S F I A G
901    TGTTTCAGAAGTCACAAGGCTCACTATGGATAGGACTGAACAAGTTAGATGTGTCCAGTG
261    M F Q K S Q G S L W I G L N K L D V S S
961    GATGGCAGTGGAGCAATGGACAGCCTTTACGCTATTTGAAATGGCTCAGTGGATTCCCAA
281    G W Q W S N G Q P L R Y L K W L S G F P
1021   GCTCACAACCAGGCTACAATTGTGGCGTCTTGAAAAATGGCTATAATTGAGAATGGTCAA
301    S S Q P G Y N C G V L K N G Y N S E W S
1081   ATGATGCTTGCTCTGAAAAACGTGGATACATCTGCCAACGAGGTCAATCTGTTCTACTG
321    N D A C S E K R G Y I C Q R G H S V P T
1141   TTCCACCAGAAGTGACGACTGGATTTTGCCAAAGCCCCTGGATTCCACATTCTGGCAACT
341    V P P E V T T G F C Q S P W I P H S G N
1201   GTTATTTTCTACACCGCACTAAGCAAACATGGCTGGAGGCACGGGACATCTGTCTGCGGG
361    C Y F L H R T K Q T W L E A R D I C L R
1261   AAGGAGGAGACCTGCTAAGTATTCTCAGCACAGAAGAGCAAAGCTTTGCCATCACACAGC
381    E G G D L L S I L S T E E Q S F A I T Q
1321   TTGGATACTCAAAGACTGATCAGCTGTGGATTGGTTTCAATGACCGCAAAACACAGATGT
401    L G Y S K T D Q L W I G F N D R K T Q M
```

Figure S1. Cont.

1381 TGT TTGAATGGAGTGACCAGTCTAGCGTCCCGTTTGCCTCATGGGAGGTTGGCGAGCCGA  
 421 L F E W S D Q S S V P F A S W E V G E P  
 1441 CTCACAGTGCTCAGCATGCCGAAGACTGCGTGTTAATGAGAGGGGAGGAGGGAAAGTGGG  
 441 T H S A Q H A E D C V L M R G E E G K W  
 1501 CTGATGATGTTTGTGAAAAAAATATGGCTTCATCTGTAAGAGAAAGACCAGCACTAAAG  
 461 A D D V C E K K Y G F I C K R K T S T K  
 1561 CCTCAAATAATGACACGGTTGTCGCAAATCCAGGATGCAAAAAGGGCTGGATCAGGTATG  
 481 A S N N D T V V A N P G C K K G W I R Y  
 1621 GGTACTATTGTTACATGGCAGGATCCGAGACAAAGACCTCCGAAGAGGCAAAACAGACGT  
 501 G Y Y C Y M A G S E T K T S E E A K Q T  
 1681 GTGAAAAGCAGAGTCTCGACTTGTAGATGTTTCATCCAGAGTAGAAAATGCATTCCTGG  
 521 C E K A E S R L V D V S S R V E N A F L  
 1741 TTAATCTAGTAGGAGCACGACCAGAGAAGTACTTCTGGATTGGACTGTCTAATCAGAAGG  
 541 V N L V G A R P E K Y F W I G L S N Q K  
 1801 ACGTACACACTTTTGAGTGGACCAACACTAAGCAAGTCCCATTCACTCACTTCAACTCTG  
 561 D V H T F E W T N T K Q V P F T H F N S  
 1861 GGATGCCAGGAAGAAAACAAGGCTGTGTTGCAATGACGACTGGAATAGTTGTGGGCTTT  
 581 G M P G R K Q G C V A M T T G I V A G L  
 1921 GGGATGTGCTTAGCTGTTCAAATAAGGAAAAATACATCTGCAAGCAAAGAGCTGATGCTC  
 601 W D V L S C S N K E K Y I C K Q R A D A  
 1981 TAGTAACAACCGCAGCCCCGCCAACCACCCCTTCCCTGGACTGTCCCACAGAATGGACTT  
 621 L V T T A A P P T T P S L D C P T E W T  
 2041 CAATTGGGACAAGAGACCTCTGTGTCAAGCATTTCATGTACCTTCACTGCAATGAAAA  
 641 S I G T R D L C V K H F N V P S L Q M K  
 2101 CATGGGATCAAGCCCTGGACTACTGCAGAGAACTCGGTGGTGACCTCCTGAGCATCCATC  
 661 T W D Q A L D Y C R E L G G D L L S I H  
 2161 ATGAATCTGATATTCCTGGAAACAAGGAGGAGGGTATCCATCTTGGATTGGTTACAGAA  
 681 H E S D I P W K Q G G G Y P S W I G Y R  
 2221 TGTATGATCCCTCTGTGGGTTACGTTTGGAGTGACGGCTCTTCGTCGTCCTATCAAAGCT  
 701 M Y D P S V G Y V W S D G S S S S Y Q S  
 2281 GGGCCAGCGATGAACCAAACAACCTAAACAACATGGAATAATGTGTTGAAATGAGAGTGT  
 721 W A S D E P N N L N N M E N C V E M R V  
 2341 CGCTGTGGGACGATGATGGGATGTGGAATGACGTGAACTGTAAAGACAAGAAGGACTGGT  
 741 S L W D D D G M W N D V N C K D K K D W  
 2401 ACTGTCAGATCCACAAAGGAAAGACTCCAGTTGAGGTGAATATTACAGAACCAGTTTATA  
 761 Y C Q I H K G K T P V E V N I T E P V Y  
 2461 ATGTAACAGAGGATGGCTGGATTGAATTCAGAGGTAGCCAGTATTATGGGTCCGAGTACT  
 781 N V T E D G W I E F R G S Q Y Y G S E Y  
 2521 CAGCGATGTCTATGCATGAAGCACGGGCGTTCTGTAAAAGAAATCATGGCGATCTTGTAG  
 801 S A M S M H E A R A F C K R N H G D L V  
 2581 TCATCAACGATGAGGAGGAGCGACTGTTCTCTGGCATAAGTCTAAAGAGTTGTACAACG  
 821 V I N D E E E R L F L W H K S K E L Y N  
 2641 ATTTTCTCATTGGCTTGACGGTTGATCTGGATGGATCTTCCAGTGGATGGATGGGTCTC  
 841 D F L I G L T V D L D G S F Q W M D G S

Figure S1. Cont.



2701 CTGTTGTGTTTCAAGCTTGGGAAGCAAATCAACCTGCCTTTAAAAACAGTGAGGAAAGGT  
 861 P V V F Q A W E A N Q P A F K N S E E R  
 2761 GCGCAAAGATGACCATATCTCAAGGACTCTGGGAAACCGTCAACTGTGGTGATGAATATA  
 881 C A K M T I S Q G L W E T V N C G D E Y  
 2821 ATTATTTTGTCAAGCGAAGTGAGGCTCCTCCAGTTAATGCTACTGTGGCCCCTACACAGC  
 901 N Y F C K R S E A P P V N A T V A P T Q  
 2881 CACCAAAAGGAGGCTGTGCGCCTGAGTGGACACAGTTCGAGGGAAAGTGCTACAATGTGA  
 921 P P K G G C A P E W T Q F E G K C Y N V  
 2941 GGGGGGAAATGAAAAAATGGAGCGAAGCAAGAGAATACTGCAGAGAACACGGTGGAGATC  
 941 R G E M K K W S E A R E Y C R E H G G D  
 3001 TGACAGCTATTATGAGCAAATTCAGCAAACATTTTAAAGCACAATGATTGAGATAAAT  
 961 L T A I M S K F Q Q T F L S T M I R D K  
 3061 CCACTAACTTTTGGATTGGATTGAGCAATCTGGCAAATGGAAGGTTCAAGTGGACAGATG  
 981 S T N F W I G F S N L A N G R F K W T D  
 3121 GGAGTAAAGTTTCATTACAGAGTGGGCTGAAGGGGAACCTCATTCTTAGTATGGTCAC  
 1001 G S K V S F T E W A E G E P H S L V W S  
 3181 GTTCATACTACTGGACAAAATACTTTTCGGACGAGCCGAATGTGTTTTATGGGCAGGA  
 1021 R S Y Y W T K Y F S D E P E C V F M G R  
 3241 GTTCAGGATCTCACTTTAGCAAGTGGGTGGCAGACGACTGTAATTCTACTAATGGCTTCA  
 1041 S S G S H F S K W V A D D C N S T N G F  
 3301 TTTGCAGTCGTGATGTTGATCCAGGTATCCCCTCAGTGCCAACTGAGATTCCTAAACCT  
 1061 I C S R D V D P G I P S V P T E I P K T  
 3361 TTGTCAAGCTTGGAATTCATCTTTCAAAGTGATTCAAGAAAACCTAACGTGGATTGAGG  
 1081 F V K L G N S S F K V I Q E N L T W I E  
 3421 CAAATCGTCGCTGTAAGGCAGAAGGGGGTCTCTGGCCAGTATTCGGGACTTGATATCAC  
 1101 A N R R C K A E G G H L A S I R D L I S  
 3481 AAGCTTACATTGAGTTGCAGGTCTTCAGACTCAAGCAGCCTATGTGGATTGGTCTCAACA  
 1121 Q A Y I E L Q V F R L K Q P M W I G L N  
 3541 GTGAACAGTCAAATGGATATTTTCTGTGGGTGAATAAATGGCCAATGACCATGGAGAAAT  
 1141 S E Q S N G Y F L W V N K W P M T M E K  
 3601 GGGCGATATCTGAACCTAGGCCCAACAAACCTTGTGCACACATGAAAATAAATGGAGAAT  
 1161 W A I S E P R P N K P C A H M K I N G E  
 3661 GGAAAACGTCTCTATGCAATGAAACCTTCTACAGTGTCTGTGAGCAAACAACGGACATTC  
 1181 W K T S L C N E T F Y S V C E Q T T D I  
 3721 CGCCAACCCTTCCAGCACAGCAGCCCGGACACTGTCCAAAGCAAGAAAATTACAGTCCCC  
 1201 P P T L P A Q Q P G H C P K Q E N Y S P  
 3781 TGAGGTGGATACCTTTGAGAGACAGCTGCTATGCTTTTGTGACAGAAATGAAATCATGGA  
 1221 L R W I P F R D S C Y A F V T E M K S W  
 3841 GCAGAGCAGCAAGACTTTGTATGACATGGGGAGCTTCTCTTGCCAGCATCAGAGATGAAG  
 1241 S R A A R L C M T W G A S L A S I R D E  
 3901 CGGAGGAGAAGTTTATAGAAAGCAACCTCTTGCTCCTTGAAAGTTATAAAGAATTTTGG  
 1261 A E E K F I E S N L L L L E S Y K E F W  
 3961 TTGGATTGTTACACAACCATAAAGGACACTGGTTATGGGCAGACAACAGTGTGGTAGATT  
 1281 I G L L H N H K G H W L W A D N S V V D

Figure S1. Cont.

```

4021      A C A C T A A C T G G G C A C T A A C T G A G A C C G G T G G T G A C T A T G A A G A A T T T T C T T A T A A T C C T G
1301      Y   T   N   W   A   L   T   E   T   G   G   D   Y   E   E   F   S   Y   N   P
4081      A C T G C G C A T T T A T C T C T G C C A C G T C T A A A A A T T G G A A A A A C G C C A C T G T G A T T A C A C A G
1321      D   C   A   F   I   S   A   T   S   K   N   W   K   K   R   H   C   D   Y   T
4141      T T T T A C C G T T C A T C T G C A A A A C C G C C A A A G T G A T T A G C C C A A C T A T T A A G T C C C C A C A T C
1341      V   L   P   F   I   C   K   T   A   K   V   I   S   P   T   I   K   S   P   H
4201      A A G A T A T T A A A C C T C A T A G G G T T A A A A C T G G A T T G G C T G T A T T C T T G A C T A T T G C A G T G A
1361      Q   D   I   K   P   H   R   V   K   T   G   L   A   V   F   L   T   I   A   V
4261      T T G C C A T A C T T G G A G C T C T A G C C T A T G T T T A C T A C A G A A G G T C A C A A C A T C G C T T C C T G C
1381      I   A   I   L   G   A   L   A   Y   V   Y   Y   R   R   S   Q   H   R   F   L
4321      C T A C A T T T G A A A A T C C C A T G T A T A A T A A C G C A G A G T C T G C T T A T T C A G A T A A A G A T A A C A
1401      P   T   F   E   N   P   M   Y   N   N   A   E   S   A   Y   S   D   K   D   N
4381      A A T C A T T G C T T G A G G T T G C A G A A T A G A C C T G T A C A T G T A G T C A T C T G G C C A G T A T C A T A A
1421      K   S   L   L   E   V   A   E   *
4441      A A T A A C A A T G G C A G G G A T C A T C A A G T T T A T T T T G T G A T A T C G G C T C C C T A C T T C T T T T A
4501      C A T G G C T G G A T G C C A A A T A A A T A A T T G A T T T G G T T A G A A A A G G A A C G T A G C C A T G T A A A T
4561      C A G T T G T C A T T T A A A G A G G G A C C T A T T A T G C C C C T C T T T A C A A G A T T T A A A A T A A G T C T C
4621      T G A T G T C T C T A G A G C G T G T A T G T G A A G T T T T A T C C C A A A A T A C C T C A C C A A T A A T G A T T T
4681      A T T A C T G C C C C T T C T A G G C T T T G A T C C T A A C T G T G T T A T T T T G G T G A C T G T T G C T T T A A G
4741      T T G A A A T A A G A T T G T G C T T T T A G C C C T C T T T T C A A A A G A G T G C A G A G C T A C A A A T G C C T T
4801      T G T G T C A G C A T A G T G G C A G A T T C A A A A C A G G A C T A A C T T C T T A C G C T A A T G A G G G A G A C
4861      A T C A T C A T T A A T A G G T G G G G C T T T C C C C T T C A T G T A C A A A G G G A G A A T G T C A A T C A A A G T
4921      A T T T G T G T A G A A C T T T T T G A A G T G T G A T T A G A A A A A T T A A A G T T A T T T T T A C C A T T A G A
4981      A A C G G G T T A T A T T C A C A C A G T C G C C A C A C A A C T G T T T A A A C C C C T T A T A A A G G T G A T T T T
5041      T G C A T A A T G G A T C C C C T T T A A T T A G T T T A A A A G T C A T T A T G A T C A A A T A A A T A A T A A
5101      A A T C T G A C T G C A C A A T G G T G C A A C T G G C T A A T C A T A T C A T A C T A C A A T T G C T G G T T T T A A
5161      T T A T T T T C T C C A A A A G C T T T T G A A C A T C A G A C T T T G T T A T T A A A T G T T A A A G T T C A A A A A
5221      T A A A T G T C T C T A A T A A C C T T C A G T T T T T A C A C T A T G G T A T A T T T G C A T T G A C T G G A T T A A
5281      C A C T C A C A A T G C A A A A A G T T T T A A G G A A G G A A C A A T G T C A A C T T T T T T G T G C C A A A A A
5341      A T T G T G G A T G T A A G G T C A G C T G A C A C T T G A A A G C T G A C A G A G T T A G C A T T T G G A G A G A C T
5401      T G T G C A A A T G T T A T A T T T A T A C T G T A A A T G A A C A C T C C A A A A G T T C T T T A T A T A T T C A T A
5461      T T C T A T G A C T A A T C C A T A A T G A A T A C A G A A T A G G G G A C T T T G G G T G G G A A C G A T T C C G A A
5521      A A T C A C C A A C T G A T A A A T G T G A T G T G T G C A T T A T T G G T T T A G G A G A G C A T T T C A A T A A C A
5581      A C A A T A T A C A G T C A G A T C A A C T G A A T A C A G A A A G A A C A T C T A T A T T A C A G T G C A G C A G T A
5641      T C T G T A C T C A G A T T C A T T A A T C C A A T A T C T A C A A A G G C A T T T A T A G A G T A T A T A C A A A T G
5701      C A T A G A A A C A A T T T T C A A G C T A T A G T G T T G C C A C A A A C T A A T G C A T A G A G T A C T C A G G A A
5761      A C A T A C A G G T A T C A A A T G T A A A T A A A A G A T A T T G T T T C A G A T G C A T T G A G G A T A T G A T A T
5821      T G C C A T C T T T T G A T T A A C A G T T T C A C A A A A G T G A A A C A A A A C A T T T A C C A T G C T G T T G
5881      T A A T G A A C A A G T A T T G T A C C T A T T T T T G T C A G T A T A T T T G T G T C T T T T A A C T T T A T G
5941      A A G A T A A A A G T A A A A A A A A A A A A T C A T A C A T A C A G A T T G T A C A T A T T T C A A T A A A C A T
6001      T C T G A A A A T C A T A A A T A C A T G C A T A T G G T T G G C T A A A A A T G A T C A C G T T G T A T A T A T T A T
6061      T A A T A T G G A A A T A C A G A A C C T A A A A C A T C A A C A G T G T T C A T T T G C A A T A A C T T T G C A T G A
6121      G C A A A G T A C A C A T A A T A T G G C T C G A G A G T T G A T T T A C A T G A T T G T G G T C T T T G T A T T G A C
6181      A A A A A T G A T T C T T T A T T A A T A A A C A G G A A A T T G A A T A T C T T A A A A A A A A A A A A A A A A A A
6241      A A A A A A A A

```

**Figure S1.** Nucleotide and deduced amino acid sequences of MR from *Danio rerio*. The start codon (ATG) was shown by bold letters. The termination code (TAG) was shown by bold letters and marked with an asterisk below, and the putative signal peptide was underlined. The motif associated with mRNA instability (ATTTA) was in bold. The polyadenylation signal (AATAAA) was tagged with bold italic.

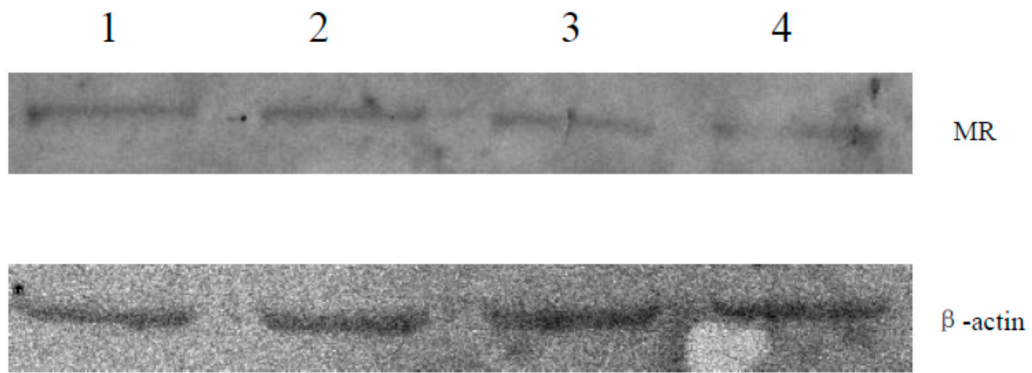

**Figure S2.** The expression of MR in the liver and spleen of zebra fish with or without the infection of *Aeromonas sobria*. The upper part of the figure is MR, the lower part of the figure is  $\beta$ -actin. Lane: 1: liver of control fish; 2: liver of infected fish; 3: spleen of control fish; 4: spleen of infected fish.
